# Supplementary material
Source: PubMed Central journal article supplement (PMC8137590)
Supplement: NIHMS1679042-supplement-1.pdf [file NIHMS1679042-supplement-1.pdf]

**Supplemental Table 1.** Variation Infants/Children with Severe BPD Born at Different Gestational Ages

| (Mean ± S.D. or % yes)<br>[Range]                                            | Severe BPD<br>≤2 years of age<br>[≤28 weeks gestation]<br>(n = 119) | Severe BPD<br>≤2 years of age<br>[>28 weeks gestation]<br>(n = 43) | <i>P</i> Value*  |
|------------------------------------------------------------------------------|---------------------------------------------------------------------|--------------------------------------------------------------------|------------------|
| <b>Gestation (weeks)</b>                                                     | 25.3 ± 1.4<br>[22.3, 28.0]                                          | 29.8 ± 1.5<br>[28.1, 33.9]                                         | <b>&lt;0.001</b> |
| <b>Age at ascertainment (years)</b>                                          | 0.9 ± 0.5<br>[0.3, 2.0]                                             | 0.6 ± 0.3<br>[0.2, 1.2]                                            | <b>&lt;0.001</b> |
| <b>Living with Smokers</b>                                                   | 9.2%                                                                | 14.0%                                                              | 0.42             |
| <b>Public Insurance</b>                                                      | 46.9%<br>(n = 113)                                                  | 42.9%<br>(n = 42)                                                  | 0.46             |
| <b>Attends Daycare</b>                                                       | 24.4%                                                               | 18.6%                                                              | 0.75             |
| <b>Any Home Respiratory Support</b>                                          | 58.8%                                                               | 41.9%                                                              | 0.09             |
| <b>Any Home Positive Pressure Ventilation<br/>(Ventilator or CPAP/BiPAP)</b> | 17.7%                                                               | 11.6%                                                              | 0.59             |
| <b>Any Diuretics</b>                                                         | 43.7%                                                               | 46.5%                                                              | 0.15             |
| <b>Any Inhaled Steroids</b>                                                  | 56.3%                                                               | 55.8%                                                              | 0.91             |
| <b>Any Pulmonary Vasodilator<br/>Medications</b>                             | 15.1%                                                               | 9.3%                                                               | 0.76             |
| <b>Any Feeding Tube</b>                                                      | 46.2%                                                               | 46.5%                                                              | 0.19             |
| <b>Sick Office or Urgent Care Visits**</b>                                   | 21.4%<br>(n = 117)                                                  | 14.0%                                                              | 0.78             |
| <b>Emergency Department Visits**</b>                                         | 23.3%<br>(n = 116)                                                  | 9.3%                                                               | <b>0.049</b>     |
| <b>Hospital Admissions**</b>                                                 | 19.1%<br>(n = 115)                                                  | 7.0%                                                               | 0.15             |
| <b>Courses of Systemic Steroids**</b>                                        | 18.2%<br>(n = 110)                                                  | 9.3%                                                               | 0.60             |

\**P* values were generated through logistic regression clustered by center and adjusted for age at which clinical features were ascertained. The *p* values for age of ascertainment and gestation were generated via t test.

\*\*Since NICU discharge or last clinic visit.
